# Supplementary material for: A Rapid In Situ Colorimetric Assay for Cobalt Detection by the Naked Eye
Source: MDPI journal article supplement (doi:10.3390/s16050626), 2016-05-02
Supplement: s1 [file s1]

# Supplementary Materials: A Rapid *In Situ* Colorimetric Assay for Cobalt Detection by the Naked Eye

Sung-Min Kang, Sung-Chang Jang, Gi Yong Kim, Chang-Soo Lee, Yun Suk Huh and Changhyun Roh

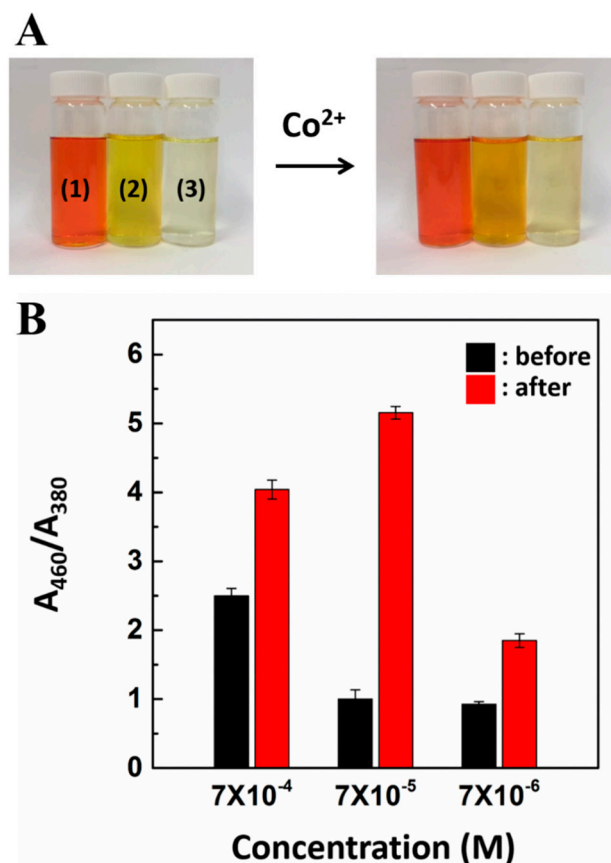

**Figure S1.** (A) The effect of initial CG chemosensor concentration for detection of cobalt. The concentrations of CG chemosensor were (1)  $7 \times 10^{-4}$  M, (2)  $7 \times 10^{-5}$  M, and (3)  $7 \times 10^{-6}$  M, respectively; (B) The difference of UV-Vis absorbance ratio to compare before with after reaction. The concentration of cobalt is 2 ppm. Each experiment was performed three times.

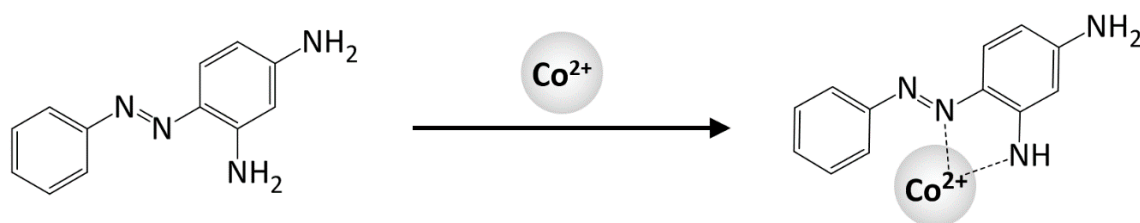

**Figure S2.** Proposed mechanism of CG chemosensor for sensing of  $\text{Co}^{2+}$ .

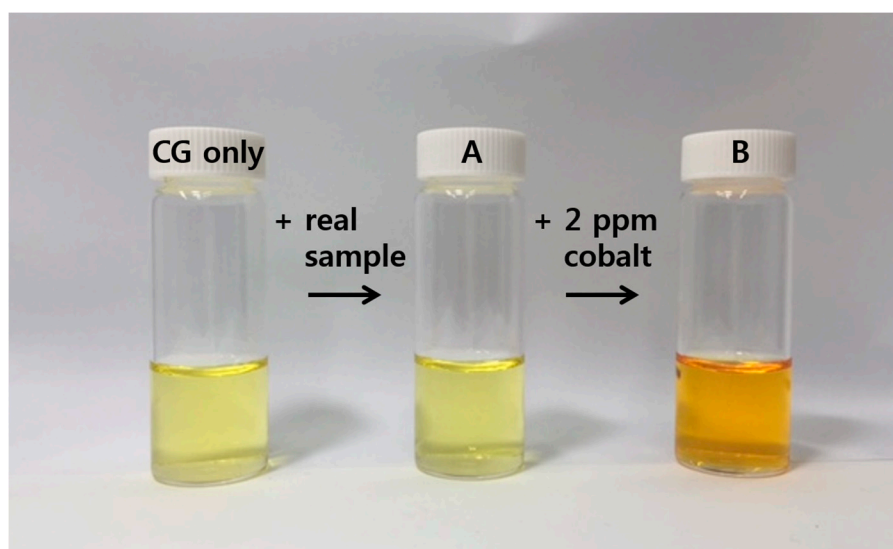

**Figure S3.** The simple and on-site colorimetric assay in real samples.
